# Supplementary material for: High genetic diversity of Vibrio cholerae in the European lake Neusiedler See is associated with intensive recombination in the reed habitat and the long-distance transfer of strains
Source: PubMed Central journal article supplement (PMC5718291; doi:10.1111/1462-2920.13612), 2017-01-18
Supplement: NIHMS75203-supplement-Suppl__Info.pdf [file NIHMS75203-supplement-Suppl__Info.pdf]

1 Pretzer C, Druzhinina IS, Amaro C, Benediktsdóttir E, Hedenström I, Hervio-Heath D, Huhulescu S,  
 2 Schets FM, Farnleitner AH, Kirschner AKT. High genetic diversity of *Vibrio cholerae* in the European lake  
 3 Neusiedler See is associated with intensive recombination in the reed habitat and the long-distance transfer of  
 4 strains. *Environmental Microbiology*  
 5

6

7 **SUPPLEMENTAL INFORMATION**

8

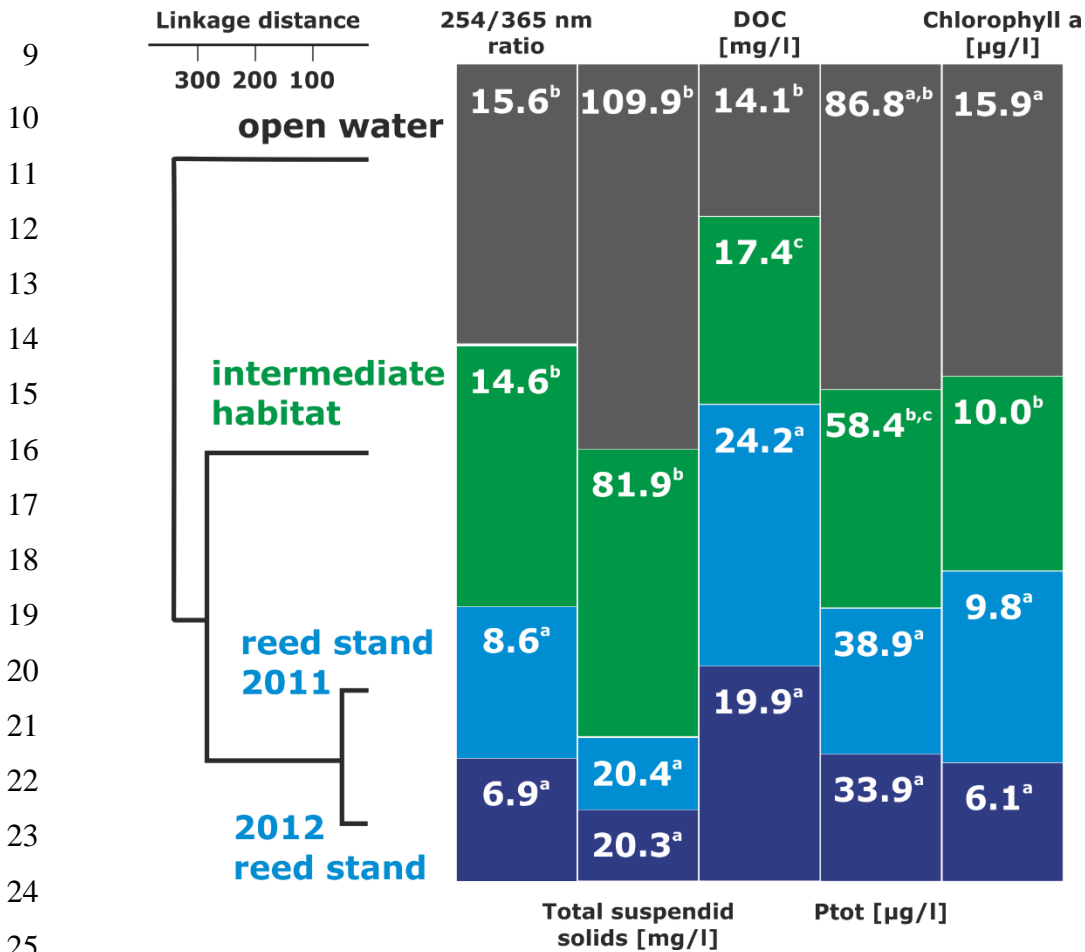

27 **Figure S1:**

28 Cluster analysis of the three investigated habitats based on their ecological characteristics. a–  
 29 c-values with the same letter are not significantly different (ANOVA, post hoc Tukey HSD  
 30 test,  $P < 0.05$ ).  
 31  
 32  
 33

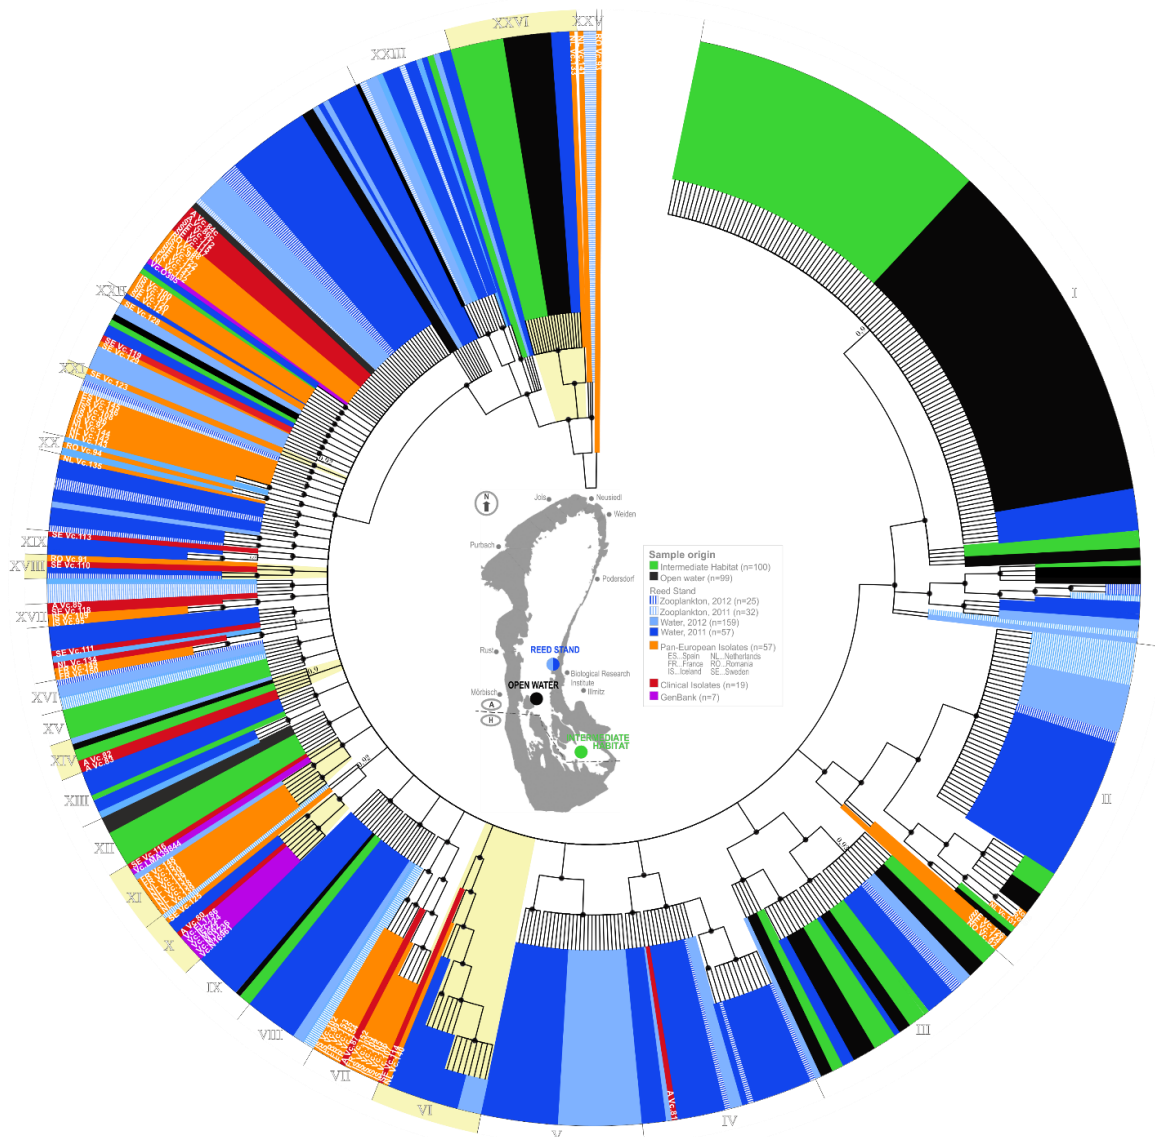

34 **Figure S2:** Bayesian tree resulting from analysis of the concatenated sequences comprising of  
 35 *gyrB*, *recA*, *pyrH* and *toxR* [2,270 bp] of 555 *Vibrio cholerae* isolates including 472 of lake  
 36 Neusiedler See, 57 Pan-European isolates, 7 reference strains and 19 clinical isolates. Nodes  
 37 indicated by black circles correspond to HTU supported by posterior probabilities of  $> 0.94$  as  
 38 inferred based on the Bayesian analysis (Figure S2). Numerical values at nodes indicate  
 39 bootstrap support obtained after 1000 replications. Supported clades were numbered with  
 40 Roman numerals but do not correspond to clades of maximum likelihood (ML) analysis in the  
 41 main manuscript (**Figure 2**). Clades marked with yellow indicated clades with mixed local  
 42 and remote isolates and with mixed local environmental and clinical isolates that were  
 43 significantly supported by ML. Colors denote origin of isolate detailed on the insert. Insert  
 44 depicts a schematic map of the lake, location of studied habitats and the isolation substrate for  
 45 the isolates. Branch lengths are transformed to equal length for better visualization and do not  
 46 represent true phylogenetic distances.

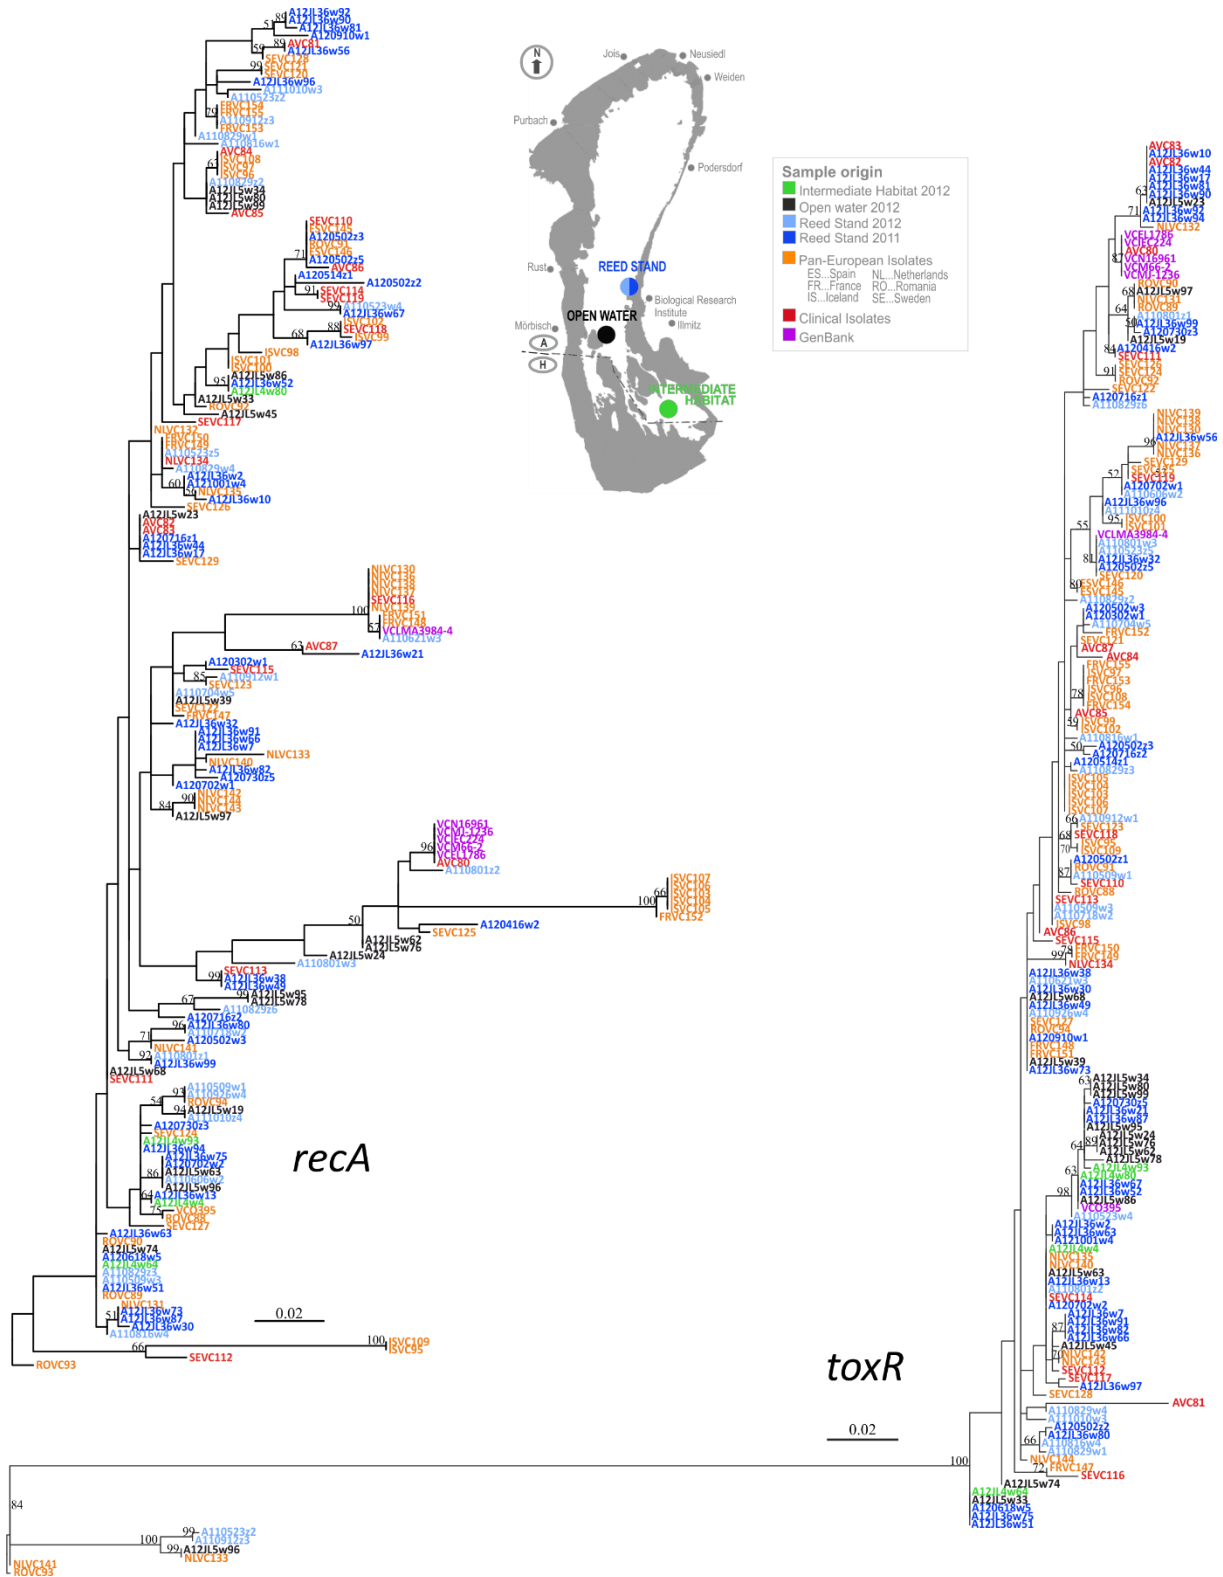

47  
 48 **Figure S3: Single locus trees for *recA* and *toxR*.** Phylogenetic tree based on the maximum likelihood  
 49 method resulting from analysis of the *recA* and *toxR* gene fragments of 177 *Vibrio cholerae* isolates  
 50 including 94 of lake Neusiedler See, 57 Pan-European isolates, 7 reference strains and 19 clinical  
 51 isolates. Bootstrap values after 1000 replications are shown. Colors denote origin of isolate detailed on  
 52 the insert. Insert depicts a schematic map of the lake and location of studied habitats.

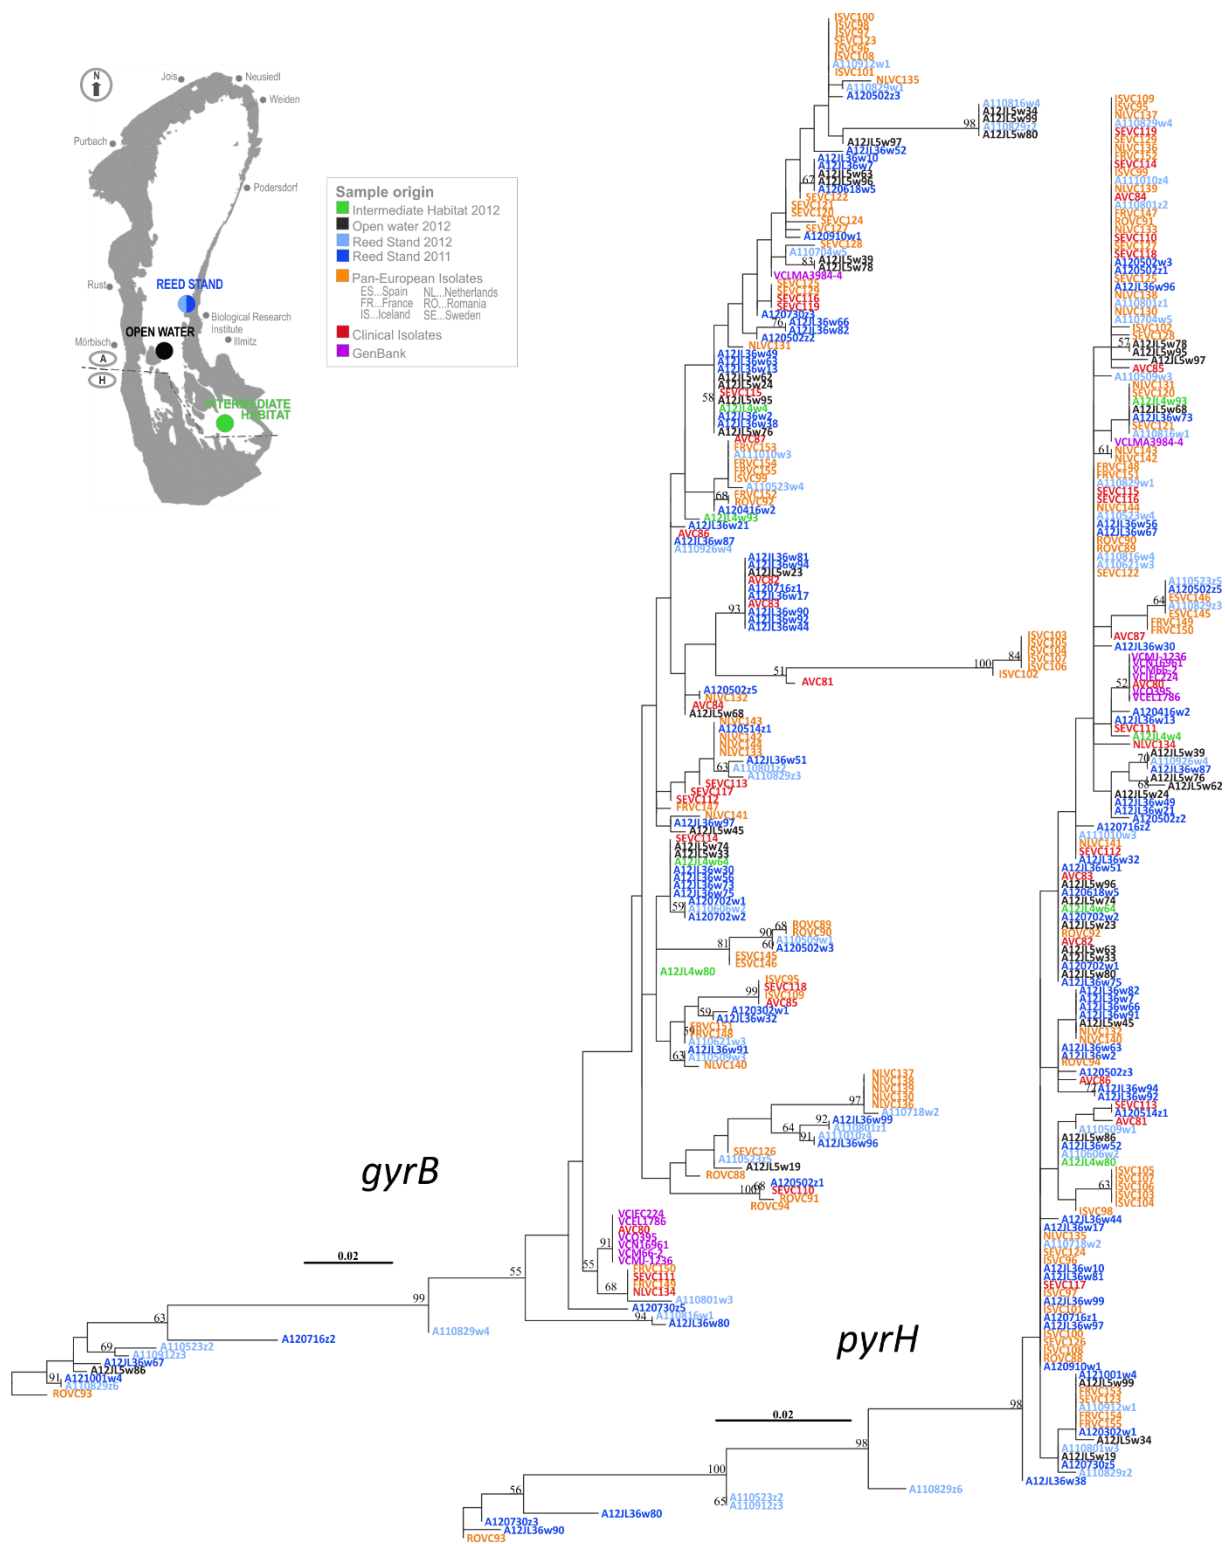

53

54 **Figure S4: Single locus trees for *gyrB* and *pyrH*.** Phylogenetic tree based on the maximum  
 55 likelihood method resulting from analysis of the *gyrB* and *pyrH* gene fragments of 177 *Vibrio*  
 56 *cholerae* isolates including 94 of lake Neusiedler See, 57 Pan-European isolates, 7 reference strains  
 57 and 19 clinical isolates. Bootstrap values after 1000 replications are shown. Colors denote origin of  
 58 isolate detailed on the insert. Insert depicts a schematic map of the lake and location of studied  
 59 habitats.

60 **Table S1:** Gene length, PCR product size and the fragment used for the analysis.

| Gene                  | Gene size [nt] | PCR product [nt] | Fragment for analysis [nt] |
|-----------------------|----------------|------------------|----------------------------|
| <i>gyrB</i>           | 2,418          | 629              | 487                        |
| <i>recA</i>           | 1,065          | 837              | 648                        |
| <i>toxR</i>           | 885            | 779              | 658                        |
| <i>pyrH</i>           | 732            | 617              | 477                        |
| <i>rpoA</i>           | 993            | 970              | -                          |
| Concatenated sequence |                |                  | 2,270                      |

61

62

63 **Table S2:** Summarized sample set. Sample source, collection year in brackets, and number of  
 64 isolates.

| Austria, lake Neusiedler See |            |            |             |                  |                       |                    |
|------------------------------|------------|------------|-------------|------------------|-----------------------|--------------------|
| Intermediate habitat         | Open water | Reed stand |             | Austria clinical | International samples | References GenBank |
| (2012)                       | (2012)     | water      | zooplankton | (2008-2012)      | (1997-2013)           | (1937-2010)        |
| 100                          | 99         | 216        | 57          | 8                | 68                    | 7                  |

65

66

67 **Table S3:** Isolates used in this study.  
68

| Quantity                      | Isolates numbers         | Date of Isolation        | Place of Isolation                                       | Source                  |
|-------------------------------|--------------------------|--------------------------|----------------------------------------------------------|-------------------------|
| <b>AUSTRIA ENVIRONMENTAL</b>  |                          |                          |                                                          |                         |
| 299                           | A12JL4w1 to A12JLw100    |                          | Austria, lake Neusiedler See, Intermediate habitat       |                         |
|                               | A12JL5w1to A12JL5w99     | 2012-09-07               | Austria, lake Neusiedler See, Open water                 | Water                   |
|                               | A12JL36w1 to A12JL36w100 |                          | Austria, lake Neusiedler See, Reed stand                 |                         |
| 57                            | A110509w1 to A110509w5   | 2011-05-09               |                                                          |                         |
|                               | A110523w1 to A110523w5   | 2011-05-23               |                                                          |                         |
|                               | A110606w1 to A110606w2   | 2011-06-06               |                                                          |                         |
|                               | A110621w1 to A110621w5   | 2011-06-21               |                                                          |                         |
|                               | A110704w1 to A110704w5   | 2011-07-04               |                                                          |                         |
|                               | A110718w1 to A110718w5   | 2011-07-18               |                                                          |                         |
|                               | A110801w1 to A110801w5   | 2011-08-01               |                                                          |                         |
|                               | A110816w1 to A110816 w5  | 2011-08-16               |                                                          |                         |
|                               | A110829w1 to A110829 w5  | 2011-08-29               |                                                          |                         |
|                               | A110912w1 to A110912w5   | 2011-09-12               |                                                          |                         |
|                               | A110926w1 to A110926 w5  | 2011-09-26               |                                                          |                         |
| A111010w1 to A111010w5        | 2011-10-10               |                          |                                                          |                         |
| 59                            | A120302w1                | 2012-03-02               | Austria, lake Neusiedler See, Reed stand                 | Water                   |
|                               | A120416w1 to A120416w3   | 2012-04-16               |                                                          |                         |
|                               | A120502w1 to A120502w5   | 2012-05-02               |                                                          |                         |
|                               | A120514w1 to A120514w5   | 2012-02-14               |                                                          |                         |
|                               | A120605w1 to A120605w5   | 2012-06-05               |                                                          |                         |
|                               | A120618w1 to A120618w5   | 2012-06-18               |                                                          |                         |
|                               | A120702w1 to A120702w5   | 2012-07-02               |                                                          |                         |
|                               | A120716w1 to A120716 w5  | 2012-07-16               |                                                          |                         |
|                               | A120730w1 to A120730w5   | 2012-07-30               |                                                          |                         |
|                               | A120806w1 to A120806w5   | 2012-08-06               |                                                          |                         |
|                               | A120828w1 to A120828w5   | 2012-08-28               |                                                          |                         |
| A120910w1 to A120910w5        | 2012-09-10               |                          |                                                          |                         |
| A121001w1 to A121001w5        | 2012-10-01               |                          |                                                          |                         |
| 32                            | A110523z1 to A110523z5   | 2011-05-23               |                                                          |                         |
|                               | A110606z1 to A110606z4   | 2011-06-06               |                                                          |                         |
|                               | A110621z1 to A110621z3   | 2011-06-21               |                                                          |                         |
|                               | A110801z1 to A110801 z5  | 2011-08-01               |                                                          |                         |
|                               | A110829z1 to A110829z6   | 2011-08-29               |                                                          |                         |
|                               | A110912z1 to A110912 z3  | 2011-09-12               |                                                          |                         |
|                               | A110926z1 to A110926z2   | 2011-09-26               | Austria, lake Neusiedler See, Reed stand                 | Zooplankton             |
| A111010z1 to A111010z4        | 2011-10-10               |                          |                                                          |                         |
| 25                            | A120502z1 to A120502z5   | 2012-05-02               |                                                          |                         |
|                               | A120514z1 to A120514z5   | 2012-05-14               |                                                          |                         |
|                               | A120618z1 to A120618z5   | 2012-06-18               |                                                          |                         |
|                               | A120716z1 to A120716 z5  | 2012-07-16               |                                                          |                         |
| A120730z1 to A120730z5        | 2012-07-30               |                          |                                                          |                         |
| <b>AUSTRIA, CLINICAL</b>      |                          |                          |                                                          |                         |
| 8                             | A (Vc. 80)               | 2008                     | Austria                                                  | Human (O1 Ogawa (1))    |
|                               | A (Vc. 81)               | 2008                     | Austria                                                  | Human                   |
|                               | A (Vc. 82)               | 2008                     | Austria                                                  | Human                   |
|                               | A (Vc. 83)               | 2009                     | Austria                                                  | Human                   |
|                               | A (Vc. 84)               | 2009                     | Austria                                                  | Human                   |
|                               | A (Vc. 85)               | 2010                     | Austria                                                  | Human                   |
|                               | A (Vc. 86)               | 2011                     | Austria                                                  | Human                   |
|                               | A (Vc. 87)               | 2012                     | Austria                                                  | Human (O1 Inaba, Egypt) |
| <b>ROMANIA, ENVIRONMENTAL</b> |                          |                          |                                                          |                         |
| 7                             | RO (Vc. 88)              | 1997                     | Romania, Braila                                          | Human faeces            |
|                               | RO (Vc. 89)              | 2000                     | Romania, Galati                                          | Danube water            |
|                               | RO (Vc. 90)              | 2000                     | Romania, lake Brates (near Galati)                       | Lake water              |
|                               | RO (Vc. 91)              | 2001                     | Romania, Galati                                          | Human faeces            |
|                               | RO (Vc. 92)              | 2001                     | Romania, lake Siutghiol (near Mamaia)                    | Lake water              |
|                               | RO (Vc. 93)              | 2002                     | Romania, Galati                                          | Wastewater              |
| RO (Vc. 94)                   | 2002                     | Romania, lake Costinesti | Lake water                                               |                         |
| <b>ICELAND, ENVIRONMENTAL</b> |                          |                          |                                                          |                         |
| 15                            | IS (Vc. 95)              | 2011-08-27               | Iceland, Berserkseyri, West coast of Iceland, rural area | Sediment                |
|                               | IS (Vc. 96)              | 2011-01-19               | Iceland, Coast beneath the street Ægissíða, Reykjavík    | Sea water               |
|                               | IS (Vc. 97)              | 2011-01-19               | Iceland, Coast beneath the street Ægissíða, Reykjavík    | Kelp                    |
|                               | IS (Vc. 98)              | 2011-08-27               | Iceland, Berserkseyri, West coast of Iceland, rural area | Sea water               |
|                               | IS (Vc. 99)              | 2011-08-27               | Iceland, Berserkseyri, West coast of Iceland, rural area | Kelp                    |
|                               | IS (Vc. 100)             | 2011-01-19               | Iceland, Coast beneath the street Ægissíða, Reykjavík    | Burrowing lugworm       |
|                               | IS (Vc. 101)             | 2011-03-21               | Iceland, Coast beneath the street Ægissíða, Reykjavík    | Sediment                |

|                                   |                                                   |            |                                                          |                                    |
|-----------------------------------|---------------------------------------------------|------------|----------------------------------------------------------|------------------------------------|
|                                   | IS (Vc. 102)                                      | 2011-08-27 | Iceland, Skaröshver, Northern Iceland, rural area        | Amphipods                          |
|                                   | IS (Vc. 103)                                      | 2012-05-22 | Iceland, Skaröshver, Northern Iceland, rural area        | Sea water                          |
|                                   | IS (Vc. 104)                                      | 2012-05-22 | Iceland, Skaröshver, Northern Iceland, rural area        | Kelp                               |
|                                   | IS (Vc. 105)                                      | 2012-05-22 | Iceland, Skaröshver, Northern Iceland, rural area        | Kelp                               |
|                                   | IS (Vc. 106)                                      | 2012-05-22 | Iceland, Skaröshver, Northern Iceland, rural area        | Sea water                          |
|                                   | IS (Vc. 107)                                      | 2011-11-22 | Iceland, Skaröshver, Northern Iceland, rural area        | Sediment                           |
|                                   | IS (Vc. 108)                                      | 2012-06-14 | Iceland, Coast beneath the street Ægissíða, Reykjavík    | Sea water                          |
|                                   | IS (Vc. 109)                                      | 2012-06-21 | Iceland, Berserkseyri, West coast of Iceland, rural area | Lugworm                            |
| <b>SWEDEN, CLINICAL</b>           |                                                   |            |                                                          |                                    |
| 10                                | SE (Vc. 110)                                      | 2006-07    | Sweden                                                   | Human, blood                       |
|                                   | SE (Vc. 111)                                      | 2006-07    | Sweden                                                   | Human, wound                       |
|                                   | SE (Vc. 112)                                      | 2006-07    | Sweden                                                   | Human, blood                       |
|                                   | SE (Vc. 113)                                      | 2006-07    | Sweden                                                   | Human, wound                       |
|                                   | SE (Vc. 114)                                      | 2006-08    | Sweden                                                   | Human, ear                         |
|                                   | SE (Vc. 115)                                      | 2006-08    | Sweden                                                   | Human, nasopharynx                 |
|                                   | SE (Vc. 116)                                      | 2006-08    | Sweden                                                   | Human, ear                         |
|                                   | SE (Vc. 117)                                      | 2006-08    | Sweden                                                   | Human, ear                         |
|                                   | SE (Vc. 118)                                      | 2006-08    | Sweden                                                   | Human, blood                       |
|                                   | SE (Vc. 119)                                      | 2006-08    | Sweden                                                   | Human, ear                         |
| <b>SWEDEN, ENVIRONMENTAL</b>      |                                                   |            |                                                          |                                    |
| 10                                | SE (Vc. 120)                                      | 2006-07    | Sweden, pond for irrigation (connected to SE Vc.111)     |                                    |
|                                   | SE (Vc. 121)                                      | 2006-07    | Sweden, Southern Baltic sea                              |                                    |
|                                   | SE (Vc. 122)                                      | 2006-07    | Sweden, Southern Baltic sea                              |                                    |
|                                   | SE (Vc. 123)                                      | 2006-07    | Sweden, Southern Baltic sea                              |                                    |
|                                   | SE (Vc. 124)                                      | 2006-07    | Sweden, Southern Baltic sea                              | Water                              |
|                                   | SE (Vc. 125)                                      | 2006-07    | Sweden, Southern Baltic sea                              |                                    |
|                                   | SE (Vc. 126)                                      | 2006-07    | Sweden, fresh water lake                                 |                                    |
|                                   | SE (Vc. 127)                                      | 2006-08    | Sweden, Southern Baltic sea                              |                                    |
|                                   | SE (Vc. 128)                                      | 2006-08    | Sweden, Southern Baltic sea                              |                                    |
|                                   | SE (Vc. 129)                                      | 2006-08    | Sweden, fresh water lake                                 |                                    |
| <b>NETHERLANDS, ENVIRONMENTAL</b> |                                                   |            |                                                          |                                    |
| 15                                | NL (Vc. 130)                                      | 2009       | Netherlands, Binnenshelde                                | Water                              |
|                                   | NL (Vc. 131)                                      | 2009       | Netherlands, Binnenshelde                                | Water                              |
|                                   | NL (Vc. 132)                                      | 2009       | Netherlands, Binnenshelde                                | Water                              |
|                                   | NL (Vc. 133)                                      | 2009       | Netherlands, Binnenshelde                                | Water                              |
|                                   | NL (Vc. 134)                                      | 2009       | Netherlands                                              | Human                              |
|                                   | NL (Vc. 135)                                      | 2010       | Netherlands, Binnenshelde                                | Water                              |
|                                   | NL (Vc. 136)                                      | 2010       | Netherlands, Binnenshelde                                | Water                              |
|                                   | NL (Vc. 137)                                      | 2010       | Netherlands, Binnenshelde                                | Water                              |
|                                   | NL (Vc. 138)                                      | 2010       | Netherlands, Binnenshelde                                | Water                              |
|                                   | NL (Vc. 139)                                      | 2011       | Netherlands, Binnenshelde                                | Water                              |
|                                   | NL (Vc. 140)                                      | 2011       | Netherlands, Binnenshelde                                | Water                              |
|                                   | NL (Vc. 141)                                      | 2011       | Netherlands, Wadden Sea, North Sea                       | Water                              |
|                                   | NL (Vc. 142)                                      | 2012       | Netherlands, Wadden Sea, North Sea                       | Water                              |
|                                   | NL (Vc. 143)                                      | 2012       | Netherlands, Wadden Sea, North Sea                       | Water                              |
|                                   | NL (Vc. 144)                                      | 2012       | Netherlands, Binnenshelde                                | Water                              |
| <b>SPAIN, ENVIRONMENTAL</b>       |                                                   |            |                                                          |                                    |
| 2                                 | ES (Vc. 145)                                      | 2013-06-19 | Spain, Natural Park of Delta del Ebro, Alfacada pond     | skin mucus of wild-eels            |
|                                   | ES (Vc. 146)                                      | 2013-06-19 | Spain, Natural Park of Delta del Ebro, Alfacada pond     |                                    |
| <b>FRANCE, ENVIRONMENTAL</b>      |                                                   |            |                                                          |                                    |
| 9                                 | FR)(Vc)147)                                       | 1999       | France, Charente Maritime, 17, Atlantic coast            | Mussel, <i>Mytilus edulis</i>      |
|                                   | FR (Vc. 148)                                      | 2012       |                                                          |                                    |
|                                   | FR (Vc. 149)                                      | 2012       |                                                          |                                    |
|                                   | FR (Vc. 150)                                      | 2012       |                                                          |                                    |
|                                   | FR (Vc. 151)                                      | 2012       | France, Finistère, 29, Atlantic coast                    | Clams, <i>Ruditapes decussatus</i> |
|                                   | FR (Vc. 152)                                      | 2013       |                                                          |                                    |
|                                   | FR (Vc. 153)                                      | 2013       |                                                          |                                    |
|                                   | FR (Vc. 154)                                      | 2013       |                                                          |                                    |
|                                   | FR (Vc. 155)                                      | 2013       |                                                          |                                    |
|                                   | <b>REFERENCE STRAINS*</b>                         |            |                                                          |                                    |
| 7                                 | <i>Vibrio cholerae</i> M66-2                      | 1937       | Indonesia                                                | Human                              |
|                                   | <i>Vibrio cholerae</i> O395                       | 1965       | India                                                    | Human                              |
|                                   | <i>Vibrio cholerae</i> O1 biovar ETor str. N16961 | 1971       | Bangladesh                                               | Human                              |
|                                   | <i>Vibrio cholerae</i> MJ-1236                    | 1994       | Bangladesh                                               | Human                              |
|                                   | <i>Vibrio cholerae</i> IEC224                     | 1994       | Brazil (2)                                               | Human                              |
|                                   | <i>Vibrio cholerae</i> LMA3984-4                  | 2007       | Brazil, Tucunduba Igarapé, Amazonian tributary (3)       | Water                              |
|                                   | <i>Vibrio cholerae</i> O1 str. 2010EL-1786        | 2010       | Artibonite, Haiti (4)                                    | Human                              |
| <b>Total</b>                      | <b>555</b>                                        |            |                                                          |                                    |

69  
70  
71  
72  
73



74 **Literature to Table S3**

75

76 (1) Huhulescu S, Leitner E, Feierl G, Allerberger F. 2010. Laboratory-acquired *Vibrio*  
77 *cholerae* O1 infection in Austria, 2008. *Clin Microbiol Infect* 16:1303-1304

78 (2) de Sa Morais LL, Garza DR, Loureiro EC, Nunes KN, Vellasco RS, da Silva CP, Nunes  
79 MR, Thompson CC, Vicente AC, Santos EC. 2012. Complete genome sequence of a sucrose-  
80 nonfermenting epidemic strain of *Vibrio cholerae* O1 from Brazil. *J Bacteriol* 194:2772.

81 (3) Perez Chaparro PJ, McCulloch JA, Cerdeira LT, Al-Dilaimi A, Canto de Sa LL, de  
82 Oliveira R, Tauch A, de Carvalho Azevedo VA, Cruz Schneider MP, da Silva AL. 2011.  
83 Whole genome sequencing of environmental *Vibrio cholerae* O1 from 10 nanograms of DNA  
84 using short reads. *J Microbiol Methods* 87:208-212.

85 (4) Reimer AR, Van Domselaar G, Stroika S, Walker M, Kent H, Tarr C, Talkington D, Rowe  
86 L, Olsen-Rasmussen M, Frace M, Sammons S, Dahourou GA, Boncy J, Smith AM, Mabon P,  
87 Petkau A, Graham M, Gilmour MW, Gerner-Smidt P; *V. cholerae* Outbreak Genomics Task  
88 Force. 2011. Comparative genomics of *Vibrio cholerae* from Haiti, Asia, and Africa. *Emerg*  
89 *Infect Dis* 17:2113-2121.
